# Supplementary material for: Perceptions of telemedicine at a pediatric otolaryngology-head and neck surgery program
Source: HighWire-hosted journal article supplement (doi:10.1136/wjps-2022-000440), 2022-11-01
Supplement: wjps-2022-000440supp001_data_supplement.pdf [file wjps-2022-000440supp001_data_supplement.pdf]

# Pediatric ENT Provider Telehealth Perceptions Survey

Thank you for taking the time to complete this brief survey to help understand and hone the role of telemedicine in the care of pediatric otolaryngology patients. Your identity is being collected so that we can identify changes in provider perception over time.

Many thanks for your time.

## Demographics: Filling out this section tells us a little about you. No identifiable information is collected.

Please select your role

- ☐ Surgeon  
☐ Nurse Practitioner

How many years experience do you have after completion of training?

- ☐ < 5 years from completion of training  
☐ >5 but less than 10 years from completion of training  
☐ >10 but less than 20 years from completion of training  
☐ >20 years from completion of training  
☐ I prefer not to answer

What is your age range?

- ☐ < 30 years  
☐ 30-39 years  
☐ 40-49 years  
☐ 50-59 years  
☐ >60 years  
☐ I prefer not to answer

What is your gender?

- ☐ Male  
☐ Female  
☐ Other  
☐ I prefer not to answer

Please denote your preferred gender, if desired

## Telehealth General Questions: The following questions assess your use of telehealth to this point.

Please estimate the number of telephone visits per week completed in the last month.

- ☐ I completed no telephone visits in the last month  
☐ < 5  
☐ 6-10  
☐ 11-20  
☐ 21-30  
☐ >30

What is your overall assessment of the utility of telephone visits?

|                                                                  |                                                    |                                                                            |
|------------------------------------------------------------------|----------------------------------------------------|----------------------------------------------------------------------------|
| No utility at all. All patients should have at least video visit | Some utility in certain situations, case dependent | Extremely useful. I could manage most of my patients with telephone visits |
|------------------------------------------------------------------|----------------------------------------------------|----------------------------------------------------------------------------|

=====

(Place a mark on the scale above)

Please estimate the number of video visits per week you completed over the last month.

- ☐ I completed no video visits in the last month  
☐ < 5  
☐ 6-10  
☐ 11-20  
☐ 21-30  
☐ >30

What is your overall assessment of the utility of video telehealth visits?

No utility at all. All patients should be seen in person

Some utility in certain situations, case dependent

Extremely useful. I could manage most of my patients with video visits

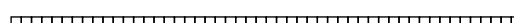

(Place a mark on the scale above)

Thank you for your participation. You do not need to complete the remainder of the survey questions. Please scroll to the bottom and submit.

- ☐ Yes ☐ No

**In the following section, you will be asked to assess the utility of history gathering, obtaining a physical examination, and making and providing medical decisions via telemedicine visits. When answering these questions, please consider only telehealth video visits. Consider both assessment of new and follow up patients in your answers.**

Martini: shaken or stirred?

- ☐ shaken ☐ stirred

### EAR-RELATED COMPLAINTS

Have you seen patients via telehealth for ear-related complaints?

- ☐ Yes  
☐ No  
(Ear complaints: RAOM, COME, hearing loss, cerumen impaction, or similar)

### -Recurrent Acute Otitis Media

Have you seen patients for recurrent acute otitis media via telehealth video visit?

- ☐ Yes ☐ No

For recurrent acute otitis media, how would you rate the effectiveness of history gathered via telehealth as related to that gained in an in-person visit?

Much LESS effective than in-person visit

EQUAL to in-person visit

Much MORE effective than in-person visit

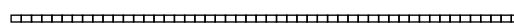

(Place a mark on the scale above)

For recurrent acute otitis media, how would you rate the effectiveness of physical exam gathered via telehealth visit as compared to in-person visit?

Much LESS effective than in-person visit

EQUAL to in-person visit

Much MORE effective than in-person visit

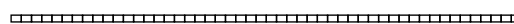

(Place a mark on the scale above)

For recurrent acute otitis media, how would you rate the effectiveness of applying medical decision making via telehealth visit as compared to in-person visit?

Much LESS effective than in-person visit

EQUAL to in-person visit

Much MORE effective than in-person visit

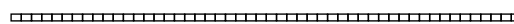

(Place a mark on the scale above)

For recurrent acute otitis media, how would you compare the effectiveness of providing patient counseling via telehealth video visit as compared to an in-person visit?

Much LESS effective than in-person visit      EQUAL to in-person visit      Much MORE effective than in-person visit

=====

(Place a mark on the scale above)

Did you find telemedicine visits useful for NEW patients with recurrent acute otitis media?

☐ Yes   ☐ No

Did you find telemedicine useful for FOLLOW UP patient visits (after a previous in person visit and exam) for recurrent acute otitis media?

☐ Yes   ☐ No

Please feel free to leave any COMMENTS regarding telemedicine visits for recurrent acute otitis media.

\_\_\_\_\_

### -Chronic Otitis Media with Effusion

Have you seen patients via telehealth video visit for chronic otitis media with effusion?

☐ Yes   ☐ No

For chronic otitis media with effusion, how would you rate the effectiveness of history gathered via telehealth as related to that gained in an in-person visit?

Much LESS effective than in-person visit      EQUAL to in-person visit      Much MORE effective than in-person visit

=====

(Place a mark on the scale above)

For chronic otitis media with effusion, how would you rate the effectiveness of physical examination gathered via telehealth as related to that gained in an in-person visit?

Much LESS effective than in-person visit      EQUAL to in-person visit      Much MORE effective than in-person visit

=====

(Place a mark on the scale above)

For chronic otitis media with effusion, how would you rate the effectiveness of applying medical decision making via telehealth visit as compared to in-person visit?

Much LESS effective than in-person visit      EQUAL to in-person visit      Much MORE effective than in-person visit

=====

(Place a mark on the scale above)

For chronic otitis media with effusion, how would you compare the effectiveness of providing patient counseling via telehealth video visit as compared to an in-person visit?

Much LESS effective than in-person visit      EQUAL to in-person visit      Much MORE effective than in-person visit

=====

(Place a mark on the scale above)

Did you find telemedicine visits useful for NEW patients with chronic otitis media with effusion?

☐ Yes   ☐ No

Did you find telemedicine visits useful for FOLLOW UP patients with chronic otitis media with effusion (after a previous in person visit and exam)?

☐ Yes   ☐ No

Please feel free to leave any COMMENTS regarding telehealth visits for patients with chronic otitis media with effusion?

---

### -Hearing Loss

Have you seen patients via telehealth video visit for hearing loss?

☐ Yes ☐ No

For hearing loss, how would you rate the effectiveness of history gathered via telehealth as related to that gained in an in-person visit?

Much LESS effective than in-person visit      EQUAL to in-person visit      Much MORE effective than in-person visit

=====

(Place a mark on the scale above)

For hearing loss, how would you rate the effectiveness of physical examination gathered via telehealth as related to that gained in an in-person visit?

Much LESS effective than in-person visit      EQUAL to in-person visit      Much MORE effective than in-person visit

=====

(Place a mark on the scale above)

For hearing loss, how would you rate the effectiveness of applying medical decision making via telehealth visit as compared to in-person visit?

Much LESS effective than in-person visit      EQUAL to in-person visit      Much MORE effective than in-person visit

=====

(Place a mark on the scale above)

For hearing loss, how would you compare the effectiveness of providing patient counseling via telehealth video visit as compared to an in-person visit?

Much LESS effective than in-person visit      EQUAL to in-person visit      Much MORE effective than in-person visit

=====

(Place a mark on the scale above)

Did you find telemedicine visits useful for NEW patients with hearing loss?

☐ Yes ☐ No

Did you find telemedicine visits useful for FOLLOW UP patients with hearing loss (after a previous in person visit and exam)?

☐ Yes ☐ No

Please feel free to leave any COMMENTS regarding telehealth visits for patients with hearing loss?

---

### -Cerumen Impaction

Have you seen patients via telehealth video visit for cerumen impaction?

☐ Yes ☐ No

For cerumen impaction, how would you rate the effectiveness of history gathered via telehealth as related to that gained in an in-person visit?

Much LESS effective than in-person visit      EQUAL to in-person visit      Much MORE effective than in-person visit

=====

(Place a mark on the scale above)

For cerumen impaction, how would you rate the effectiveness of physical examination gathered via telehealth as related to that gained in an in-person visit?

Much LESS effective than in-person visit      EQUAL to in-person visit      Much MORE effective than in-person visit

=====

(Place a mark on the scale above)

For cerumen impaction, how would you rate the effectiveness of applying medical decision making via telehealth visit as compared to in-person visit?

Much LESS effective than in-person visit      EQUAL to in-person visit      Much MORE effective than in-person visit

=====

(Place a mark on the scale above)

For cerumen impaction, how would you compare the effectiveness of providing patient counseling via telehealth video visit as compared to an in-person visit?

Much LESS effective than in-person visit      EQUAL to in-person visit      Much MORE effective than in-person visit

=====

(Place a mark on the scale above)

Did you find telemedicine visits useful for NEW patients with cerumen impaction?

☐ Yes   ☐ No

Did you find telemedicine visits useful for FOLLOW UP patients with cerumen impaction (after a previous in person visit and exam)?

☐ Yes   ☐ No

Please feel free to leave any COMMENTS regarding telehealth visits for patients with cerumen impaction.

\_\_\_\_\_

## NASAL COMPLAINTS

Have you seen patients via telehealth for nasal complaints?

☐ Yes   ☐ No  
(Nasal complaints: allergic rhinitis, nasal congestion, recurrent epistaxis or similar)

## -Nasal congestion/Allergic rhinitis

Have you seen patients via telehealth video visit for nasal congestion or allergic rhinitis?

☐ Yes   ☐ No

For nasal congestion or allergic rhinitis, how would you rate the effectiveness of history gathered via telehealth as related to that gained in an in-person visit?

Much LESS effective than in-person visit      EQUAL to in-person visit      Much MORE effective than in-person visit

=====

(Place a mark on the scale above)

For nasal congestion or allergic rhinitis, how would you rate the effectiveness of physical examination gathered via telehealth as related to that gained in an in-person visit?

Much LESS effective than in-person visit      EQUAL to in-person visit      Much MORE effective than in-person visit

=====

(Place a mark on the scale above)

For nasal congestion or allergic rhinitis, how would you rate the effectiveness of applying medical decision making via telehealth visit as compared to in-person visit?

Much LESS effective than in-person visit      EQUAL to in-person visit      Much MORE effective than in-person visit

=====

(Place a mark on the scale above)

For nasal congestion or allergic rhinitis, how would you compare the effectiveness of providing patient counseling via telehealth video visit as compared to an in-person visit?

Much LESS effective than in-person visit      EQUAL to in-person visit      Much MORE effective than in-person visit

=====

(Place a mark on the scale above)

Did you find telemedicine visits useful for NEW patients with nasal congestion or allergic rhinitis?

☐ Yes   ☐ No

Did you find telemedicine visits useful for FOLLOW UP patients with nasal congestion or allergic rhinitis (after a previous in person visit and exam)?

☐ Yes   ☐ No

Please feel free to leave any COMMENTS regarding telehealth visits for patients with nasal congestion or allergic rhinitis.

\_\_\_\_\_

### -Nasal injury/fracture

Have you seen patients via telehealth video visit for nasal injury/fracture?

☐ Yes   ☐ No

For nasal injury/fracture, how would you rate the effectiveness of history gathered via telehealth as related to that gained in an in-person visit?

Much LESS effective than in-person visit      EQUAL to in-person visit      Much MORE effective than in-person visit

=====

(Place a mark on the scale above)

For nasal injury/fracture, how would you rate the effectiveness of physical examination gathered via telehealth as related to that gained in an in-person visit?

Much LESS effective than in-person visit      EQUAL to in-person visit      Much MORE effective than in-person visit

=====

(Place a mark on the scale above)

For nasal injury/fracture, how would you rate the effectiveness of applying medical decision making via telehealth visit as compared to in-person visit?

Much LESS effective than in-person visit      EQUAL to in-person visit      Much MORE effective than in-person visit

=====

(Place a mark on the scale above)

For nasal injury/fracture, how would you compare the effectiveness of providing patient counseling via telehealth video visit as compared to an in-person visit?

Much LESS effective than in-person visit      EQUAL to in-person visit      Much MORE effective than in-person visit

=====

(Place a mark on the scale above)

Did you find telemedicine visits useful for NEW patients with nasal injury/fracture?

☐ Yes   ☐ No

Did you find telemedicine visits useful for FOLLOW UP patients with nasal injury/fracture (after a previous in person visit and exam)?

☐ Yes ☐ No

Please feel free to leave any COMMENTS regarding telehealth visits for patients with nasal injury/fracture.

### -Recurrent Epistaxis

Have you seen patients via telehealth video visit for recurrent epistaxis?

☐ Yes ☐ No

For recurrent epistaxis, how would you rate the effectiveness of history gathered via telehealth as related to that gained in an in-person visit?

Much LESS effective than in-person visit      EQUAL to in-person visit      Much MORE effective than in-person visit

=====

(Place a mark on the scale above)

For recurrent epistaxis, how would you rate the effectiveness of physical examination gathered via telehealth as related to that gained in an in-person visit?

Much LESS effective than in-person visit      EQUAL to in-person visit      Much MORE effective than in-person visit

=====

(Place a mark on the scale above)

For recurrent epistaxis, how would you rate the effectiveness of applying medical decision making via telehealth visit as compared to in-person visit?

Much LESS effective than in-person visit      EQUAL to in-person visit      Much MORE effective than in-person visit

=====

(Place a mark on the scale above)

For recurrent epistaxis, how would you compare the effectiveness of providing patient counseling via telehealth video visit as compared to an in-person visit?

Much LESS effective than in-person visit      EQUAL to in-person visit      Much MORE effective than in-person visit

=====

(Place a mark on the scale above)

Did you find telemedicine visits useful for NEW patients with recurrent epistaxis?

☐ Yes ☐ No

Did you find telemedicine visits useful for FOLLOW UP patients with recurrent epistaxis (after a previous in person visit and exam)?

☐ Yes ☐ No

Please feel free to leave any COMMENTS regarding telehealth visits for patients with epistaxis.

**ORAL CAVITY/PHARYNGEAL COMPLAINTS**

Have you seen patients for mouth/throat-related complaints?

☐ Yes ☐ No

(Mouth/throat complaints: lip/tongue tie, sleep disordered breathing, OSA, snoring, enlarged tonsils, recurrent pharyngitis, or similar)

**-Snoring / Sleep Disordered Breathing / Obstructive Sleep Apnea**

Have you seen patients via telehealth video visit for snoring/sleep disordered breathing/OSA?

☐ Yes ☐ No

For snoring/SDB/OSA, how would you rate the effectiveness of history gathered via telehealth as related to that gained in an in-person visit?

Much LESS  
effective than  
in-person visit

EQUAL to  
in-person visit

Much MORE  
effective than  
in-person visit

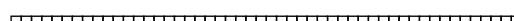

(Place a mark on the scale above)

For snoring/SDB/OSA, how would you rate the effectiveness of physical examination gathered via telehealth as related to that gained in an in-person visit?

Much LESS  
effective than  
in-person visit

EQUAL to  
in-person visit

Much MORE  
effective than  
in-person visit

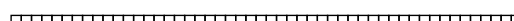

(Place a mark on the scale above)

For snoring/SDB/OSA, how would you rate the effectiveness of applying medical decision making via telehealth visit as compared to in-person visit?

Much LESS  
effective than  
in-person visit

EQUAL to  
in-person visit

Much MORE  
effective than  
in-person visit

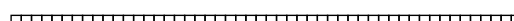

(Place a mark on the scale above)

For snoring/SDB/OSA, how would you compare the effectiveness of providing patient counseling via telehealth video visit as compared to an in-person visit?

Much LESS  
effective than  
in-person visit

EQUAL to  
in-person visit

Much MORE  
effective than  
in-person visit

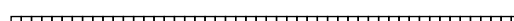

(Place a mark on the scale above)

Did you find telemedicine visits useful for NEW patients with snoring/SDB/OSA?

☐ Yes ☐ No

Did you find telemedicine visits useful for FOLLOW UP patients with snoring/SDB/OSA (after a previous in person visit and exam)?

☐ Yes ☐ No

Please feel free to leave any COMMENTS regarding telehealth visits for patients with snoring/SDB/OSA.

\_\_\_\_\_



**-Recurrent / Chronic Pharyngitis**

Have you seen patients via telehealth video visit for recurrent/chronic pharyngitis?

☐ Yes ☐ No

For recurrent pharyngitis, how would you rate the effectiveness of history gathered via telehealth as related to that gained in an in-person visit?

Much LESS effective than in-person visit      EQUAL to in-person visit      Much MORE effective than in-person visit

=====

(Place a mark on the scale above)

For recurrent pharyngitis, how would you rate the effectiveness of physical examination gathered via telehealth as related to that gained in an in-person visit?

Much LESS effective than in-person visit      EQUAL to in-person visit      Much MORE effective than in-person visit

=====

(Place a mark on the scale above)

For recurrent pharyngitis, how would you rate the effectiveness of applying medical decision making via telehealth visit as compared to in-person visit?

Much LESS effective than in-person visit      EQUAL to in-person visit      Much MORE effective than in-person visit

=====

(Place a mark on the scale above)

For recurrent pharyngitis, how would you compare the effectiveness of providing patient counseling via telehealth video visit as compared to an in-person visit?

Much LESS effective than in-person visit      EQUAL to in-person visit      Much MORE effective than in-person visit

=====

(Place a mark on the scale above)

Did you find telemedicine visits useful for NEW patients with recurrent pharyngitis?

☐ Yes ☐ No

Did you find telemedicine visits useful for FOLLOW UP patients with recurrent pharyngitis (after a previous in person visit and exam)?

☐ Yes ☐ No

Please feel free to leave any COMMENTS regarding telehealth visits for patients with recurrent pharyngitis.

\_\_\_\_\_

**Lip/Tongue tie**

Have you seen patients via telehealth video visit for lip or tongue tie?

☐ Yes ☐ No

For tongue/lip tie, how would you rate the effectiveness of history gathered via telehealth as related to that gained in an in-person visit?

Much LESS effective than in-person visit      EQUAL to in-person visit      Much MORE effective than in-person visit

=====

(Place a mark on the scale above)

For tongue/lip tie, how would you rate the effectiveness of physical examination gathered via telehealth as related to that gained in an in-person visit?

Much LESS effective than in-person visit      EQUAL to in-person visit      Much MORE effective than in-person visit

=====

(Place a mark on the scale above)

For tongue/lip tie, how would you rate the effectiveness of applying medical decision making via telehealth visit as compared to in-person visit?

Much LESS effective than in-person visit      EQUAL to in-person visit      Much MORE effective than in-person visit

=====

(Place a mark on the scale above)

For tongue/lip tie, how would you compare the effectiveness of providing patient counseling via telehealth video visit as compared to an in-person visit?

Much LESS effective than in-person visit      EQUAL to in-person visit      Much MORE effective than in-person visit

=====

(Place a mark on the scale above)

Did you find telemedicine visits useful for NEW patients with tongue/lip tie?

☐ Yes   ☐ No

Did you find telemedicine visits useful for FOLLOW UP patients with tongue/lip tie (after a previous in person visit and exam)?

☐ Yes   ☐ No

Please feel free to leave any COMMENTS regarding telehealth visits for patients with lip/tongue tie.

\_\_\_\_\_

## HEAD AND NECK MASSES

Have you seen patients via telehealth for mass-related complaints?

☐ Yes   ☐ No  
(Mass complaints: neck mass, other head and neck tumors, or similar)

## -Neck Mass

Have you seen patients via telehealth video visit for neck mass?

☐ Yes   ☐ No

For neck mass, how would you rate the effectiveness of history gathered via telehealth as related to that gained in an in-person visit?

Much LESS effective than in-person visit      EQUAL to in-person visit      Much MORE effective than in-person visit

=====

(Place a mark on the scale above)

For neck mass, how would you rate the effectiveness of physical examination gathered via telehealth as related to that gained in an in-person visit?

Much LESS effective than in-person visit      EQUAL to in-person visit      Much MORE effective than in-person visit

=====

(Place a mark on the scale above)

For neck mass, how would you rate the effectiveness of applying medical decision making via telehealth visit as compared to in-person visit?

Much LESS effective than in-person visit      EQUAL to in-person visit      Much MORE effective than in-person visit

=====

(Place a mark on the scale above)

For neck mass, how would you compare the effectiveness of providing patient counseling via telehealth video visit as compared to an in-person visit?

Much LESS effective than in-person visit      EQUAL to in-person visit      Much MORE effective than in-person visit

=====

(Place a mark on the scale above)

Did you find telemedicine visits useful for NEW patients with neck mass?

☐ Yes ☐ No

Did you find telemedicine visits useful for FOLLOW UP patients with neck mass (after a previous in person visit and exam)?

☐ Yes ☐ No

Please feel free to leave any COMMENTS regarding telehealth visits for patients with neck mass.

### **-Head and Neck Tumor (non-neck mass)**

Have you seen patients via telehealth video visit for a head and neck tumor (non-neck mass)?

☐ Yes ☐ No

For head and neck tumors (non-neck mass), how would you rate the effectiveness of history gathered via telehealth as related to that gained in an in-person visit?

Much LESS effective than in-person visit      EQUAL to in-person visit      Much MORE effective than in-person visit

=====

(Place a mark on the scale above)

For head and neck tumors (non-neck mass), how would you rate the effectiveness of physical examination gathered via telehealth as related to that gained in an in-person visit?

Much LESS effective than in-person visit      EQUAL to in-person visit      Much MORE effective than in-person visit

=====

(Place a mark on the scale above)

For head and neck tumors (non-neck mass), how would you rate the effectiveness of applying medical decision making via telehealth visit as compared to in-person visit?

Much LESS effective than in-person visit      EQUAL to in-person visit      Much MORE effective than in-person visit

=====

(Place a mark on the scale above)

For head and neck tumors (non-neck mass), how would you compare the effectiveness of providing patient counseling via telehealth video visit as compared to an in-person visit?

Much LESS effective than in-person visit      EQUAL to in-person visit      Much MORE effective than in-person visit

=====

(Place a mark on the scale above)

Did you find telemedicine visits useful for NEW patients with head and neck tumors (non-neck mass)?

☐ Yes ☐ No

Did you find telemedicine visits useful for FOLLOW UP patients with head and neck tumors (non-neck mass) (after a previous in person visit and exam)?

☐ Yes ☐ No

Please feel free to leave any COMMENTS regarding telehealth visits for patients with head and neck tumors (non-neck mass).

**AIRWAY**

Have you seen patients via telehealth for airway-related complaints?

☐ Yes ☐ No  
(Airway complaints: stridor, noisy breathing, known airway stenosis, tracheostomy dependence, or similar)

**-Stridor/ Noisy Breathing**

Have you seen patients via telehealth video visit for stridor/noisy breathing?

☐ Yes ☐ No

For stridor/noisy breathing, how would you rate the effectiveness of history gathered via telehealth as related to that gained in an in-person visit?

Much LESS effective than in-person visit      EQUAL to in-person visit      Much MORE effective than in-person visit

=====

(Place a mark on the scale above)

For stridor/noisy breathing, how would you rate the effectiveness of physical examination gathered via telehealth as related to that gained in an in-person visit?

Much LESS effective than in-person visit      EQUAL to in-person visit      Much MORE effective than in-person visit

=====

(Place a mark on the scale above)

For stridor/noisy breathing, how would you rate the effectiveness of applying medical decision making via telehealth visit as compared to in-person visit?

Much LESS effective than in-person visit      EQUAL to in-person visit      Much MORE effective than in-person visit

=====

(Place a mark on the scale above)

For stridor/noisy breathing, how would you compare the effectiveness of providing patient counseling via telehealth video visit as compared to an in-person visit?

Much LESS effective than in-person visit      EQUAL to in-person visit      Much MORE effective than in-person visit

=====

(Place a mark on the scale above)

Did you find telemedicine visits useful for NEW patients with stridor/noisy breathing?

☐ Yes ☐ No

Did you find telemedicine visits useful for FOLLOW UP patients with stridor/noisy breathing (after a previous in person visit and exam)?

☐ Yes ☐ No

Please feel free to leave any COMMENTS regarding telehealth visits for patients with stridor/noisy breathing.

\_\_\_\_\_

**-Known Airway Stenosis (non-trach dependent)**

Have you seen patients via telehealth video visit for known airway stenosis (non-trach dependent)?

☐ Yes ☐ No

For airway stenosis, how would you rate the effectiveness of history gathered via telehealth as related to that gained in an in-person visit?

Much LESS effective than in-person visit      EQUAL to in-person visit      Much MORE effective than in-person visit

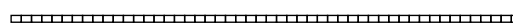

(Place a mark on the scale above)

For airway stenosis, how would you rate the effectiveness of physical examination gathered via telehealth as related to that gained in an in-person visit?

Much LESS effective than in-person visit      EQUAL to in-person visit      Much MORE effective than in-person visit

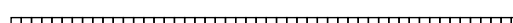

(Place a mark on the scale above)

For airway stenosis, how would you rate the effectiveness of applying medical decision making via telehealth visit as compared to in-person visit?

Much LESS effective than in-person visit      EQUAL to in-person visit      Much MORE effective than in-person visit

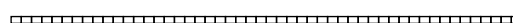

(Place a mark on the scale above)

For airway stenosis, how would you compare the effectiveness of providing patient counseling via telehealth video visit as compared to an in-person visit?

Much LESS effective than in-person visit      EQUAL to in-person visit      Much MORE effective than in-person visit

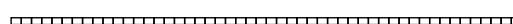

(Place a mark on the scale above)

Did you find telemedicine visits useful for NEW patients with airway stenosis?

☐ Yes ☐ No

Did you find telemedicine visits useful for FOLLOW UP patients with airway stenosis (after a previous in person visit and exam)?

☐ Yes ☐ No

Please feel free to leave any COMMENTS regarding telehealth visits for patients with airway stenosis.

\_\_\_\_\_

**-Tracheostomy Dependence (any reason)**

Have you seen patients via telehealth video visit for tracheostomy dependence (for any reason)?

☐ Yes ☐ No

For tracheostomy dependence, how would you rate the effectiveness of history gathered via telehealth as related to that gained in an in-person visit?

Much LESS effective than in-person visit      EQUAL to in-person visit      Much MORE effective than in-person visit

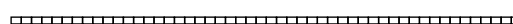

(Place a mark on the scale above)

For tracheostomy dependence, how would you rate the effectiveness of physical examination gathered via telehealth as related to that gained in an in-person visit?

Much LESS effective than in-person visit      EQUAL to in-person visit      Much MORE effective than in-person visit

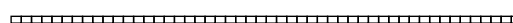

(Place a mark on the scale above)

For tracheostomy dependence, how would you rate the effectiveness of applying medical decision making via telehealth visit as compared to in-person visit?

Much LESS effective than in-person visit      EQUAL to in-person visit      Much MORE effective than in-person visit

=====

(Place a mark on the scale above)

For tracheostomy dependence, how would you compare the effectiveness of providing patient counseling via telehealth video visit as compared to an in-person visit?

Much LESS effective than in-person visit      EQUAL to in-person visit      Much MORE effective than in-person visit

=====

(Place a mark on the scale above)

Did you find telemedicine visits useful for NEW patients with tracheostomy dependence?

☐ Yes   ☐ No

Did you find telemedicine visits useful for FOLLOW UP patients with tracheostomy dependence (after a previous in person visit and exam)?

☐ Yes   ☐ No

Please feel free to leave any COMMENTS regarding telehealth visits for patients with tracheostomy dependence.

\_\_\_\_\_

## FEEDING/DYSPHAGIA

Have you seen patients via telehealth for feeding/swallowing problems?

☐ Yes   ☐ No

## -Non-Neonatal Swallowing/Feeding Difficulties

Have you seen patients via telehealth video visit for non-neonatal swallowing or eating difficulties?

☐ Yes   ☐ No

For feeding/swallowing difficulties, how would you rate the effectiveness of history gathered via telehealth as related to that gained in an in-person visit?

Much LESS effective than in-person visit      EQUAL to in-person visit      Much MORE effective than in-person visit

=====

(Place a mark on the scale above)

For feeding/swallowing difficulties, how would you rate the effectiveness of physical examination gathered via telehealth as related to that gained in an in-person visit?

Much LESS effective than in-person visit      EQUAL to in-person visit      Much MORE effective than in-person visit

=====

(Place a mark on the scale above)

For feeding/swallowing difficulties, how would you rate the effectiveness of applying medical decision making via telehealth visit as compared to in-person visit?

Much LESS effective than in-person visit      EQUAL to in-person visit      Much MORE effective than in-person visit

=====

(Place a mark on the scale above)

For feeding/swallowing difficulties, how would you compare the effectiveness of providing patient counseling via telehealth video visit as compared to an in-person visit?

Much LESS  
effective than  
in-person visit

EQUAL to  
in-person visit

Much MORE  
effective than  
in-person visit

=====

(Place a mark on the scale above)

Did you find telemedicine visits useful for NEW patients with feeding/swallowing difficulties?

☐ Yes ☐ No

Did you find telemedicine visits useful for FOLLOW UP patients with feeding/swallowing difficulties (after a previous in person visit and exam)?

☐ Yes ☐ No

Please feel free to leave any COMMENTS regarding telehealth visits for patients with feeding/swallowing difficulties.

\_\_\_\_\_

### **-Neonatal Feeding/Swallowing Difficulties (not related to lip/tongue tie)**

Have you seen patients via telehealth video visit for neonatal swallowing or feeding difficulties (not related to tongue/lip tie)?

☐ Yes ☐ No

For neonatal feeding/swallowing difficulties, how would you rate the effectiveness of history gathered via telehealth as related to that gained in an in-person visit?

Much LESS  
effective than  
in-person visit

EQUAL to  
in-person visit

Much MORE  
effective than  
in-person visit

=====

(Place a mark on the scale above)

For neonatal feeding/swallowing difficulties, how would you rate the effectiveness of physical examination gathered via telehealth as related to that gained in an in-person visit?

Much LESS  
effective than  
in-person visit

EQUAL to  
in-person visit

Much MORE  
effective than  
in-person visit

=====

(Place a mark on the scale above)

For neonatal feeding/swallowing difficulties, how would you rate the effectiveness of applying medical decision making via telehealth visit as compared to in-person visit?

Much LESS  
effective than  
in-person visit

EQUAL to  
in-person visit

Much MORE  
effective than  
in-person visit

=====

(Place a mark on the scale above)

For neonatal feeding/swallowing difficulties, how would you compare the effectiveness of providing patient counseling via telehealth video visit as compared to an in-person visit?

Much LESS  
effective than  
in-person visit

EQUAL to  
in-person visit

Much MORE  
effective than  
in-person visit

=====

(Place a mark on the scale above)

Did you find telemedicine visits useful for NEW patients with neonatal feeding/swallowing difficulties?

☐ Yes ☐ No

Did you find telemedicine visits useful for FOLLOW UP patients with neonatal feeding/swallowing difficulties (after a previous in person visit and exam)?

☐ Yes ☐ No

Please feel free to leave any COMMENTS regarding telehealth visits for patients with neonatal feeding/swallowing difficulties.

---

### POSTOPERATIVE VISITS: LAST QUESTION!!!

After which of the following surgeries would you feel comfortable managing the postoperative visit with a video telehealth? Assume no combo procedures when answering. Please select ALL that apply. If telehealth would be appropriate for the majority (>50%) of patients but not all, please include in your selections.

- ☐ Bilateral ear tube insertion
- ☐ Ear tube removal with/without myringoplasty
- ☐ Tympanoplasty
- ☐ Tympanomastoidectomy with/without OCR
- ☐ Cochlear implantation
- ☐ Nasal cautery
- ☐ Inferior turbinate reduction
- ☐ Septoplasty
- ☐ Endoscopic sinus surgery
- ☐ Adenoidectomy (without tonsillectomy)
- ☐ Tonsillectomy (with or without adenoidectomy)
- ☐ Supraglottoplasty
- ☐ Other laryngoscopy with excision
- ☐ Tracheal airway surgery (endoscopic)
- ☐ Tracheal airway surgery (open)
- ☐ Tracheostomy
- ☐ Excision of neck mass
- ☐ Repair of laceration
- ☐ Speech surgery
- ☐ Sleep surgery (non T&A)
- ☐ Skull base surgery

Thank you very much for taking the time to complete the survey. Please feel free to enter any general comments.

---
